# Supplementary material for: Compatibility driven self-strengthening during the radical-responsive remolding process of poly-isoprene vitrimers
Source: Royal Society of Chemistry journal article supplement (doi:10.1039/c9ta09292g), 2019-01-01
Supplement: c9ta09292g1.pdf [file c9ta09292g1.pdf]

## Supplementary Information

### Compatibility driven self-strengthening during radical-responsive remolding process of poly-isoprene vitrimers

Fangwei Ling, Zhenwei Liu, Mokun Chen, Hao Wang, Yong Zhu, Changshu Ma, Jinrong Wu\* and Guangsu Huang\*

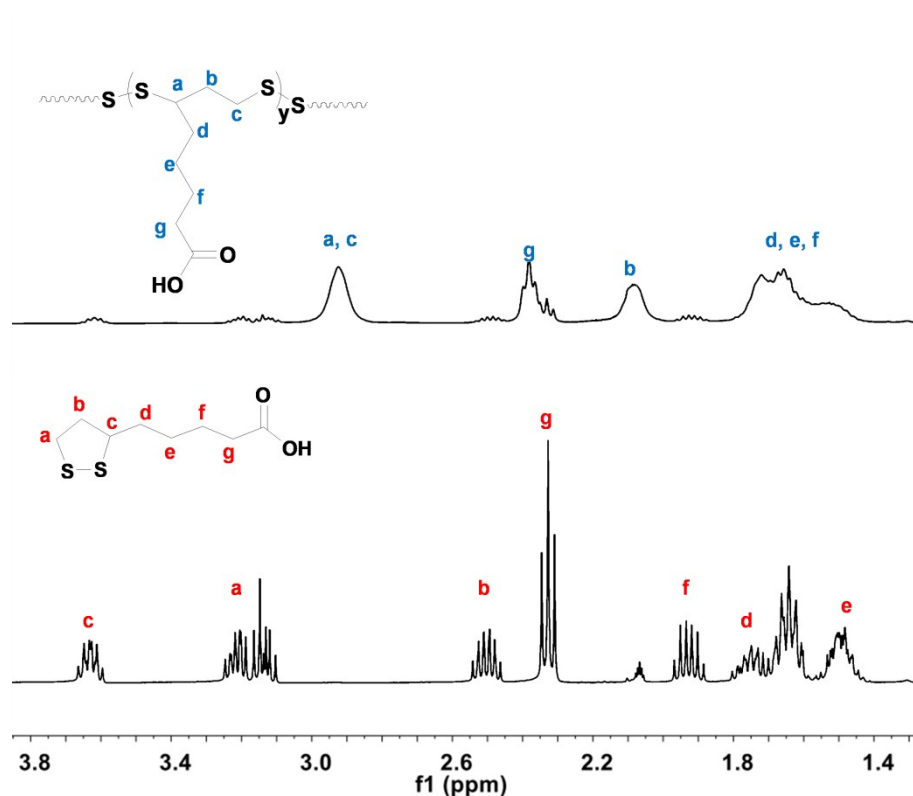

Figure S1. <sup>1</sup>H-NMR spectra of TA monomer and PTA in [D<sub>6</sub>] acetone.

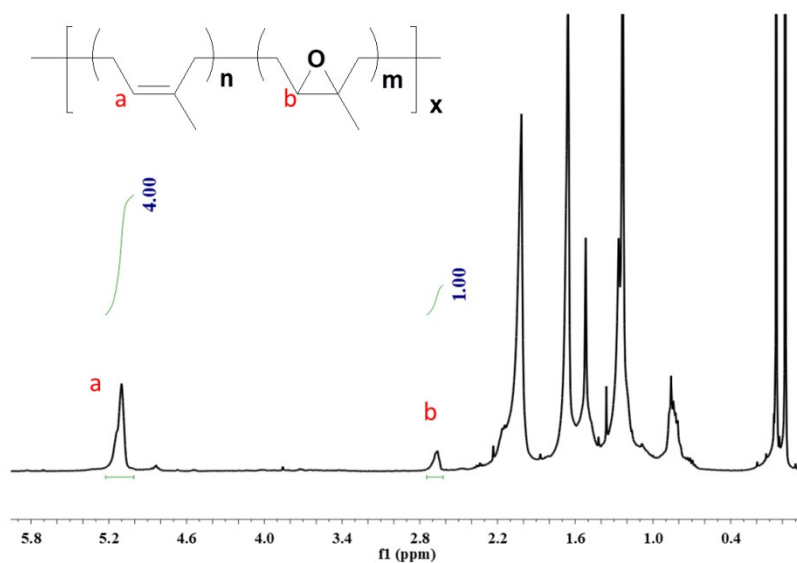

Figure S2.  $^1\text{H}$ -NMR spectra of EPIP.

$\delta = 5.12$  ppm for the olefinic hydrogen of *cis*-1,4 PIP;  $\delta = 2.64$  ppm for the epoxy hydrogen. The ratio of the segment with epoxy groups is 20% in the whole molecular chain.

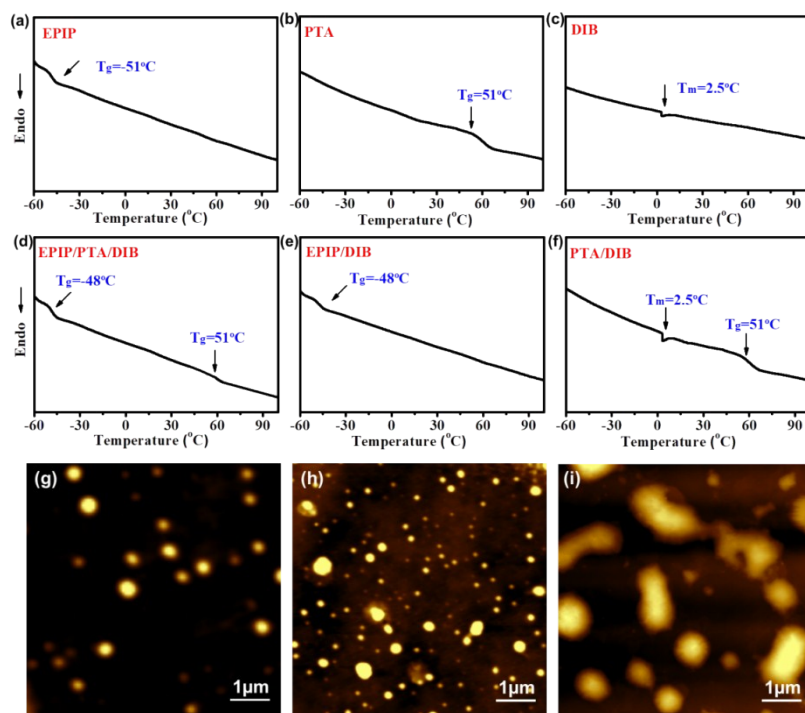

Figure S3. DSC charts of (a) EPIP, (b) PTA, (c) DIB, (d) EPIP/PTA/DIB mixture, (e) EPIP/DIB mixture, and (f) PTA/DIB mixture. AFM phase maps of (g) EPIP/PTA-4, (h) EPIP/PTA-8, and (i) EPIP/PTA-16.

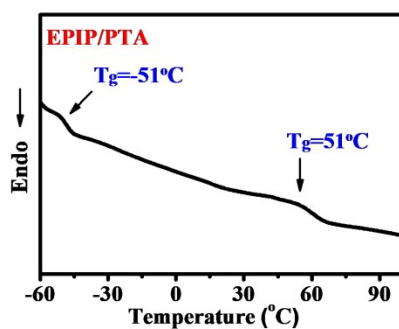

Figure S4. DSC chart of EPIP/PTA mixture.

Table S1. Formulations for EPIP/PTA-n and EPIP/SA samples

| Samples     | EPIP (g) | poly(carboxylic acid) (mg) | DIB (mg) | DMI (mg) | Zn(Ac) <sub>2</sub> (mg) |
|-------------|----------|----------------------------|----------|----------|--------------------------|
| EPIP/PTA-4  | 10       | 309(PTA)                   | 92       | 60       | 110                      |
| EPIP/PTA-8  | 10       | 619(PTA)                   | 185      | 120      | 220                      |
| EPIP/PTA-16 | 10       | 1238(PTA)                  | 370      | 240      | 440                      |
| EPIP/SA     | 10       | 517(SA)                    | 0        | 120      | 220                      |

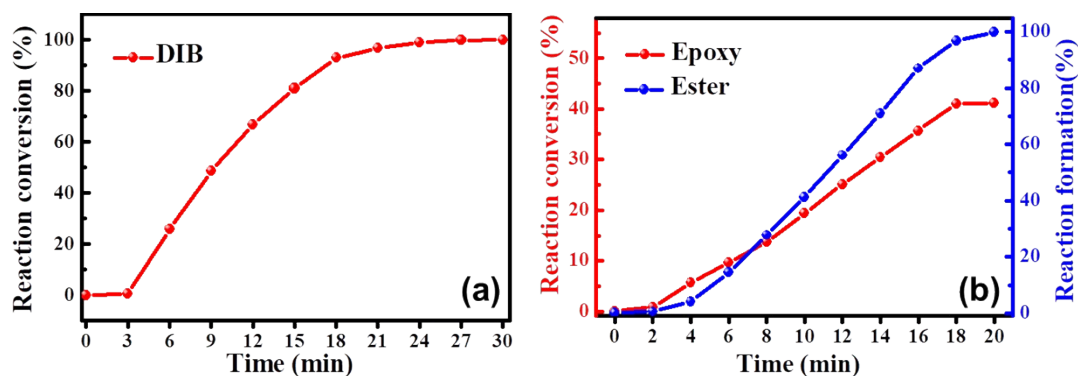

Figure S5. Reaction conversions calculated from the FTIR spectrum (Figure 1a and 1b). (a) Reaction conversion of DIB in PIP/PTA/DIB mixture. (b) Reaction conversion of oxirane rings and reaction formation of the  $\beta$ -hydroxyl ester bonds in EPIP/PTA-8.

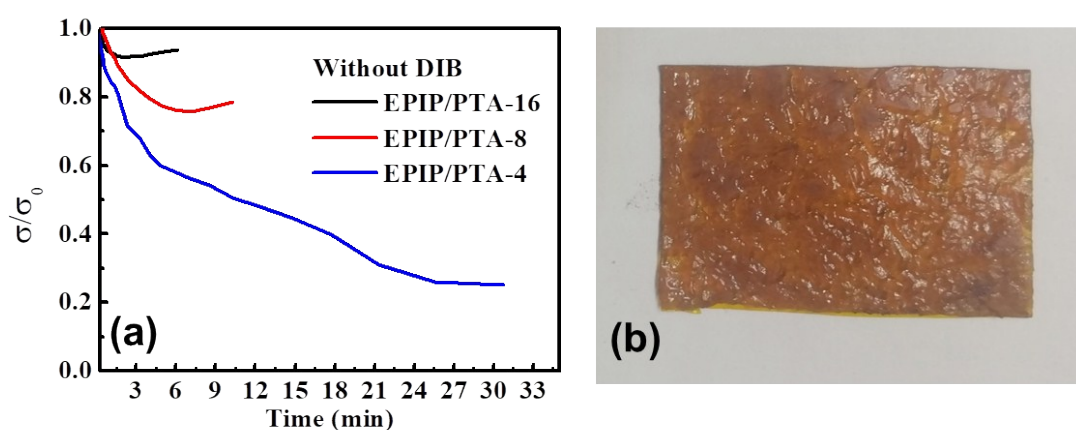

Figure S6. (a) Stress-relaxation curves of EPIP/PTA-n samples without DIB at 180 °C and the constant strain is 1%. (b) Photograph of the reprocessed rubber films without DIB by hot press at 180 °C.

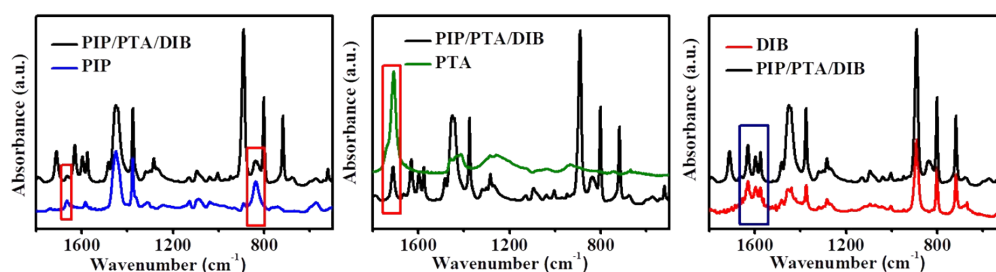

Figure S7. FTIR spectra of PIP, PTA, DIB and the PIP/PTA/DIB mixture at the initial state.

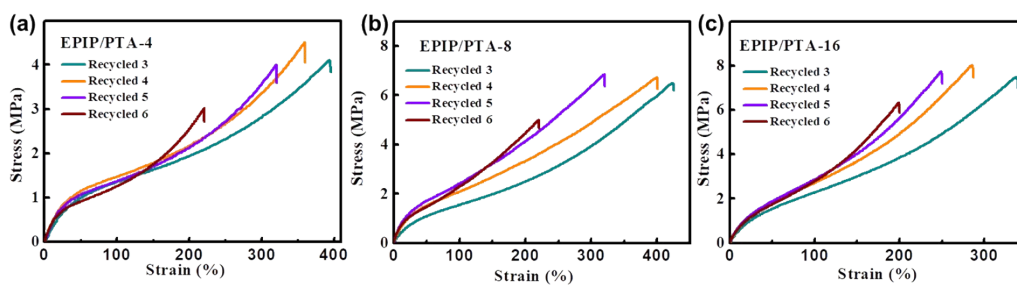

Figure S8. Stress-strain curves of the recycled samples of (c)EPIP/PTA-4, (d)EPIP/PTA-8 and (e) EPIP/PTA-16.

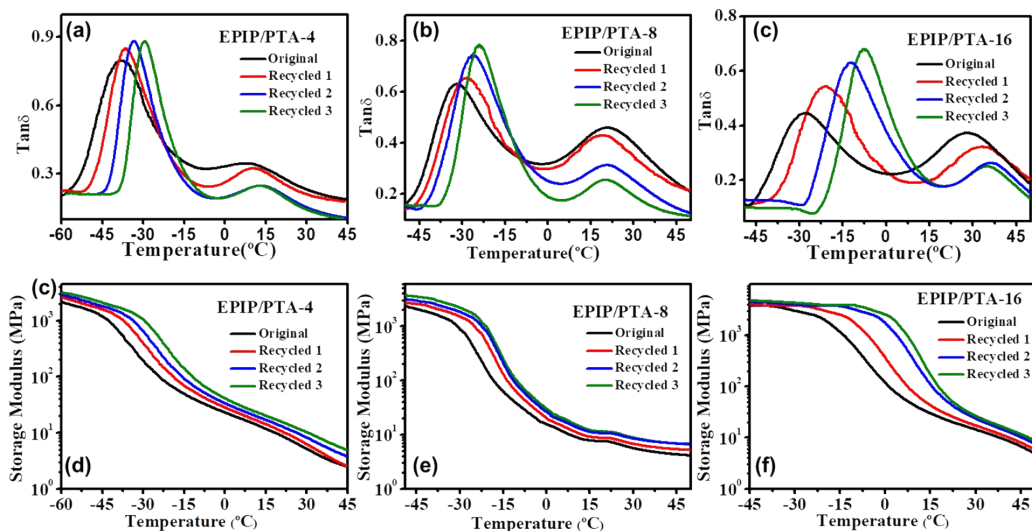

Figure S9. Temperature-dependent  $\tan \delta$  curves of the original and the recycled samples of (a)EPIP/PTA-4, (b)EPIP/PTA-8 and (c) EPIP/PTA-16. Storage modulus curves of the original and the recycled samples of (d)EPIP/PTA-4, (e)EPIP/PTA-8 and (f) EPIP/PTA-16.

Table S2. Crosslinking densities of the original and the recycled samples of EPIP/PTA-n

| Crosslinking density $10^{-4} \text{ mol/cm}^3$ | EPIP/PTA-4 | EPIP/PTA-8 | EPIP/PTA-16 |
|-------------------------------------------------|------------|------------|-------------|
| Original                                        | 4          | 6          | 10          |
| Recycled 1                                      | 6          | 9          | 15          |
| Recycled 2                                      | 6.8        | 10         | 16.4        |
| Recycled 3                                      | 7.2        | 10.8       | 17          |

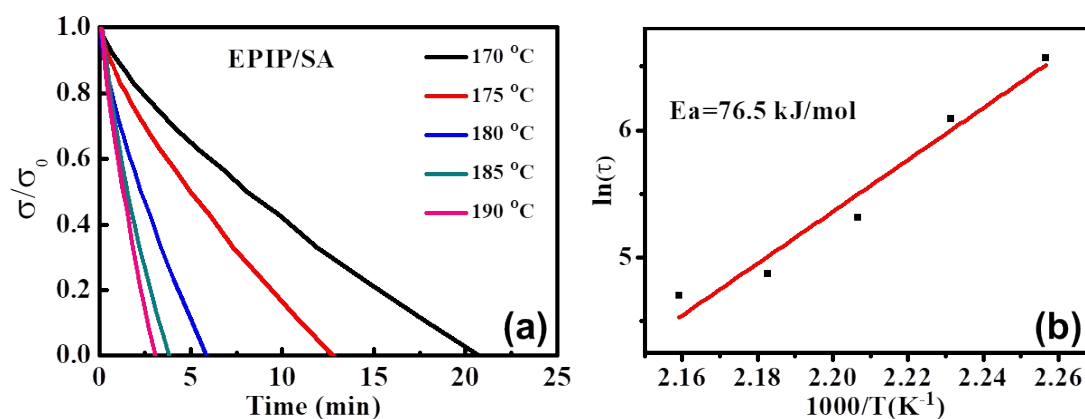

Figure S10. (a) Normalized stress relaxation for EPIP/SA at various temperatures ranging from 170 °C to 190 °C with a constant strain of 1%. (b) Fitting of  $\tau^*$  the Arrhenius equation for EPIP/SA.

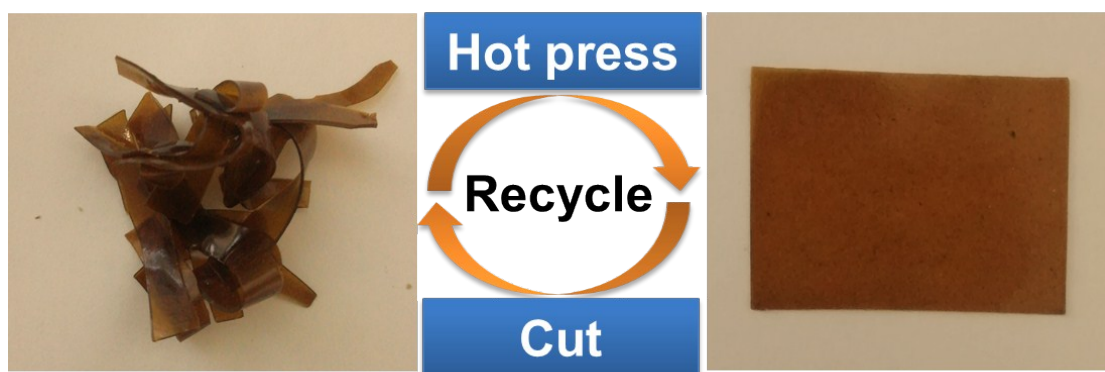

Figure S11. Photograph of the original cut samples (left) and the reprocessed (right) rubber films by hot press at 180 °C.

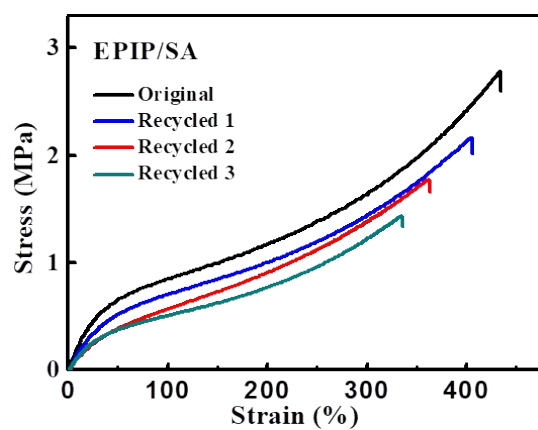

Figure S12. Stress-strain curves of the original and the recycled samples of EPIP/SA.
